# Supplementary material for: Prevention of adhesions post-abdominal surgery: Assessing the safety and efficacy of Chitogel with Deferiprone in a rat model
Source: PubMed Central journal article supplement (PMC7808615; doi:10.1371/journal.pone.0244503), 2021-01-14
Supplement: pone.0244503.s003.pdf [file pone.0244503.s003.pdf]

In [6]:

```
import pandas as pd

df = pd.read_csv("./data/rajan_rat_abdominal_study1_2.tsv", sep="\t")

treatments = df['treatment'].sort_values().unique()

rajan_df = df

rajan_df
```

Out[6]:

|     | rat_num | markus_score | inflammation_HE | fibrosis_MT | treatment | injury_model |
|-----|---------|--------------|-----------------|-------------|-----------|--------------|
| 0   | 21      | 2            | 2               | 2           | _Saline   | abrasion     |
| 1   | 22      | 3            | 2               | 2           | CD        | abrasion     |
| 2   | 24      | 1            | 3               | 3           | def_20mM  | abrasion     |
| 3   | 25      | 2            | 2               | 2           | def_10mM  | abrasion     |
| 4   | 26      | 2            | 2               | 2           | CD        | abrasion     |
| 5   | 28      | 1            | 3               | 3           | def_20mM  | abrasion     |
| 6   | 29      | 0            | 3               | 3           | def_10mM  | abrasion     |
| 7   | 30      | 2            | 2               | 2           | _Saline   | abrasion     |
| 8   | 32      | 1            | 2               | 2           | def_20mM  | abrasion     |
| 9   | 33      | 2            | 2               | 2           | def_10mM  | abrasion     |
| 10  | 34      | 2            | 1               | 1           | _Saline   | abrasion     |
| 11  | 35      | 3            | 3               | 3           | CD        | abrasion     |
| 12  | 36      | 3            | 2               | 2           | def_20mM  | abrasion     |
| 13  | 37      | 2            | 2               | 2           | def_10mM  | abrasion     |
| 14  | 38      | 2            | 3               | 3           | _Saline   | abrasion     |
| 15  | 39      | 1            | 1               | 1           | CD        | abrasion     |
| 16  | 41      | 1            | 1               | 1           | CD        | abrasion     |
| 17  | 42      | 5            | 3               | 3           | _Saline   | abrasion     |
| 18  | 43      | 4            | 2               | 2           | def_10mM  | abrasion     |
| 19  | 44      | 5            | 3               | 3           | def_20mM  | abrasion     |
| 20  | 45      | 5            | 3               | 3           | def_20mM  | abrasion     |
| 21  | 46      | 5            | 1               | 1           | def_10mM  | abrasion     |
| 22  | 47      | 2            | 2               | 2           | def_10mM  | abrasion     |
| 23  | 48      | 1            | 3               | 3           | _Saline   | abrasion     |
| 24  | 49      | 2            | 1               | 2           | CD        | abrasion     |
| 25  | 50      | 5            | 2               | 2           | def_20mM  | abrasion     |
| 26  | 51      | 2            | 3               | 3           | CD        | abrasion     |
| 27  | 52      | 1            | 3               | 3           | CD        | abrasion     |
| 28  | 53      | 4            | 2               | 2           | def_20mM  | abrasion     |
| 29  | 54      | 0            | 1               | 1           | def_10mM  | abrasion     |
| ... | ...     | ...          | ...             | ...         | ...       | ...          |
| 78  | 109     | 4            | 2               | 2           | _Saline   | enterotomy   |
| 79  | 110     | 4            | 2               | 2           | cd        | enterotomy   |
| 80  | 111     | 4            | 2               | 2           | _Saline   | enterotomy   |
| 81  | 112     | 3            | 3               | 3           | cd        | enterotomy   |
| 82  | 113     | 5            | 3               | 2           | _Saline   | enterotomy   |
| 83  | 114     | 5            | 3               | 3           | cd        | enterotomy   |
| 84  | 115     | 4            | 3               | 3           | def_5mM   | enterotomy   |
| 85  | 116     | 3            | 3               | 3           | def_1mM   | enterotomy   |
| 86  | 117     | 3            | 2               | 2           | def_5mM   | enterotomy   |
| 87  | 118     | 2            | 3               | 3           | def_1mM   | enterotomy   |
| 88  | 119     | 3            | 3               | 3           | def_5mM   | enterotomy   |
| 89  | 120     | 3            | 3               | 3           | def_1mM   | enterotomy   |
| 90  | 121     | 3            | 2               | 2           | def_5mM   | enterotomy   |
| 91  | 122     | 2            | 3               | 3           | def_5mM   | enterotomy   |
| 92  | 123     | 3            | 2               | 2           | def_1mM   | enterotomy   |
| 93  | 124     | 4            | 2               | 2           | def_1mM   | enterotomy   |
| 94  | 125     | 4            | 3               | 3           | def_5mM   | enterotomy   |
| 95  | 126     | 3            | 2               | 2           | def_1mM   | enterotomy   |
| 96  | 127     | 3            | 2               | 2           | def_5mM   | enterotomy   |
| 97  | 128     | 3            | 1               | 1           | def_1mM   | enterotomy   |
| 98  | 129     | 2            | 3               | 3           | def_5mM   | enterotomy   |
| 99  | 130     | 2            | 3               | 3           | def_1mM   | enterotomy   |
| 100 | 131     | 2            | 1               | 1           | def_5mM   | enterotomy   |
| 101 | 132     | 2            | 2               | 2           | def_1mM   | enterotomy   |

|     | rat_num | markus_score | inflammation_HE | fibrosis_MT | treatment | injury_model |
|-----|---------|--------------|-----------------|-------------|-----------|--------------|
| 102 | 133     | 3            | 3               | 3           | def_5mM   | enterotomy   |
| 103 | 134     | 2            | 3               | 2           | def_1mM   | enterotomy   |
| 104 | 135     | 2            | 3               | 3           | def_5mM   | enterotomy   |
| 105 | 136     | 3            | 3               | 3           | def_1mM   | enterotomy   |
| 106 | 137     | 3            | 3               | 3           | def_5mM   | enterotomy   |
| 107 | 138     | 2            | 3               | 3           | def_1mM   | enterotomy   |

108 rows × 6 columns

In [7]:

```
%load_ext rpy2.ipython
%R -i treatments

The rpy2.ipython extension is already loaded. To reload it, use:
%reload_ext rpy2.ipython
```

In [8]:

```
%%R
library(ordinal)
library(emmeans)
```

In [13]:

```
%%R
rajan_df <- read.csv("./data/rajan_rat_abdominal_study1_2.tsv", sep="\t")
```

## Markus (Blinded) Score

In [19]:

```
%%R
clm_model <- clm(factor(markus_score, ordered=TRUE, levels = c(0, 1, 2, 3, 4, 5)) ~ treatment + factor(injury_model), data=rajan_df, link=
print(summary(clm_model))
print(emmeans(clm_model, ~ treatment + injury_model, mode="mean.class", adjust='fdr'))
print(emmeans(clm_model, pairwise ~ injury_model + treatment, mode="mean.class", adjust='fdr'))
```

```
formula:
factor(markus_score, ordered = TRUE, levels = c(0, 1, 2, 3, 4, 5)) ~ treatment + factor(injury_model)
data:   rajan_df
```

```
link threshold nobs logLik AIC      niter max.grad cond.H
logit flexible 108 -170.24 362.48 5(0) 6.66e-08 1.2e+02
```

Coefficients:

|                                | Estimate | Std. Error | z value | Pr(> z )   |
|--------------------------------|----------|------------|---------|------------|
| treatmentCD                    | -0.6616  | 0.5245     | -1.262  | 0.20711    |
| treatmentdef_10mM              | -0.9228  | 0.7125     | -1.295  | 0.19528    |
| treatmentdef_1mM               | -1.7197  | 0.6363     | -2.703  | 0.00688 ** |
| treatmentdef_20mM              | -0.4817  | 0.7829     | -0.615  | 0.53838    |
| treatmentdef_5mM               | -1.7566  | 0.5430     | -3.235  | 0.00122 ** |
| factor(injury_model)enterotomy | 1.3106   | 0.4455     | 2.942   | 0.00326 ** |

Signif. codes: 0 '\*\*\*' 0.001 '\*\*' 0.01 '\*' 0.05 '.' 0.1 ' ' 1

Threshold coefficients:

|     | Estimate | Std. Error | z value |
|-----|----------|------------|---------|
| 0 1 | -3.3865  | 0.6057     | -5.591  |
| 1 2 | -2.1311  | 0.5104     | -4.175  |
| 2 3 | -0.5379  | 0.4853     | -1.108  |
| 3 4 | 0.6482   | 0.4932     | 1.314   |
| 4 5 | 1.7934   | 0.5140     | 3.489   |

| treatment | injury_model | mean.class | SE    | df  | asympt.LCL | asympt.UCL |
|-----------|--------------|------------|-------|-----|------------|------------|
| _Saline   | abrasion     | 3.98       | 0.330 | Inf | 3.33       | 4.63       |
| CD        | abrasion     | 3.51       | 0.289 | Inf | 2.95       | 4.08       |
| def_10mM  | abrasion     | 3.33       | 0.370 | Inf | 2.60       | 4.06       |
| def_1mM   | abrasion     | 2.79       | 0.415 | Inf | 1.98       | 3.61       |
| def_20mM  | abrasion     | 3.64       | 0.443 | Inf | 2.77       | 4.51       |
| def_5mM   | abrasion     | 2.77       | 0.293 | Inf | 2.19       | 3.34       |
| _Saline   | enterotomy   | 4.87       | 0.260 | Inf | 4.36       | 5.38       |
| CD        | enterotomy   | 4.43       | 0.279 | Inf | 3.88       | 4.98       |
| def_10mM  | enterotomy   | 4.25       | 0.479 | Inf | 3.31       | 5.19       |
| def_1mM   | enterotomy   | 3.69       | 0.323 | Inf | 3.06       | 4.32       |
| def_20mM  | enterotomy   | 4.55       | 0.510 | Inf | 3.55       | 5.55       |
| def_5mM   | enterotomy   | 3.66       | 0.280 | Inf | 3.12       | 4.21       |

Confidence level used: 0.95

\$emmeans

| injury_model | treatment | mean.class | SE    | df  | asympt.LCL | asympt.UCL |
|--------------|-----------|------------|-------|-----|------------|------------|
| abrasion     | _Saline   | 3.98       | 0.330 | Inf | 3.33       | 4.63       |
| enterotomy   | _Saline   | 4.87       | 0.260 | Inf | 4.36       | 5.38       |
| abrasion     | CD        | 3.51       | 0.289 | Inf | 2.95       | 4.08       |
| enterotomy   | CD        | 4.43       | 0.279 | Inf | 3.88       | 4.98       |
| abrasion     | def_10mM  | 3.33       | 0.370 | Inf | 2.60       | 4.06       |
| enterotomy   | def_10mM  | 4.25       | 0.479 | Inf | 3.31       | 5.19       |
| abrasion     | def_1mM   | 2.79       | 0.415 | Inf | 1.98       | 3.61       |
| enterotomy   | def_1mM   | 3.69       | 0.323 | Inf | 3.06       | 4.32       |
| abrasion     | def_20mM  | 3.64       | 0.443 | Inf | 2.77       | 4.51       |
| enterotomy   | def_20mM  | 4.55       | 0.510 | Inf | 3.55       | 5.55       |
| abrasion     | def_5mM   | 2.77       | 0.293 | Inf | 2.19       | 3.34       |
| enterotomy   | def_5mM   | 3.66       | 0.280 | Inf | 3.12       | 4.21       |

Confidence level used: 0.95

\$contrasts

| contrast                                  | estimate | SE    | df  | z.ratio | p.value |
|-------------------------------------------|----------|-------|-----|---------|---------|
| abrasion,_Saline - enterotomy,_Saline     | -0.8868  | 0.293 | Inf | -3.022  | 0.0128  |
| abrasion,_Saline - abrasion,CD            | 0.4664   | 0.368 | Inf | 1.266   | 0.3476  |
| abrasion,_Saline - enterotomy,CD          | -0.4536  | 0.491 | Inf | -0.924  | 0.5098  |
| abrasion,_Saline - abrasion,def_10mM      | 0.6479   | 0.496 | Inf | 1.305   | 0.3476  |
| abrasion,_Saline - enterotomy,def_10mM    | -0.2729  | 0.671 | Inf | -0.407  | 0.7841  |
| abrasion,_Saline - abrasion,def_1mM       | 1.1867   | 0.423 | Inf | 2.806   | 0.0207  |
| abrasion,_Saline - enterotomy,def_1mM     | 0.2891   | 0.464 | Inf | 0.623   | 0.6817  |
| abrasion,_Saline - abrasion,def_20mM      | 0.3402   | 0.551 | Inf | 0.617   | 0.6817  |
| abrasion,_Saline - enterotomy,def_20mM    | -0.5756  | 0.689 | Inf | -0.835  | 0.5671  |
| abrasion,_Saline - abrasion,def_5mM       | 1.2109   | 0.364 | Inf | 3.324   | 0.0098  |
| abrasion,_Saline - enterotomy,def_5mM     | 0.3151   | 0.481 | Inf | 0.655   | 0.6767  |
| enterotomy,_Saline - abrasion,CD          | 1.3532   | 0.428 | Inf | 3.160   | 0.0116  |
| enterotomy,_Saline - enterotomy,CD        | 0.4332   | 0.340 | Inf | 1.275   | 0.3476  |
| enterotomy,_Saline - abrasion,def_10mM    | 1.5347   | 0.452 | Inf | 3.392   | 0.0092  |
| enterotomy,_Saline - enterotomy,def_10mM  | 0.6139   | 0.484 | Inf | 1.268   | 0.3476  |
| enterotomy,_Saline - abrasion,def_1mM     | 2.0734   | 0.546 | Inf | 3.800   | 0.0048  |
| enterotomy,_Saline - enterotomy,def_1mM   | 1.1759   | 0.414 | Inf | 2.840   | 0.0199  |
| enterotomy,_Saline - abrasion,def_20mM    | 1.2269   | 0.515 | Inf | 2.383   | 0.0606  |
| enterotomy,_Saline - enterotomy,def_20mM  | 0.3112   | 0.518 | Inf | 0.601   | 0.6824  |
| enterotomy,_Saline - abrasion,def_5mM     | 2.0977   | 0.435 | Inf | 4.825   | 0.0001  |
| enterotomy,_Saline - enterotomy,def_5mM   | 1.2018   | 0.348 | Inf | 3.450   | 0.0092  |
| abrasion,CD - enterotomy,CD               | -0.9200  | 0.298 | Inf | -3.092  | 0.0116  |
| abrasion,CD - abrasion,def_10mM           | 0.1815   | 0.469 | Inf | 0.387   | 0.7841  |
| abrasion,CD - enterotomy,def_10mM         | -0.7393  | 0.637 | Inf | -1.161  | 0.3857  |
| abrasion,CD - abrasion,def_1mM            | 0.7203   | 0.410 | Inf | 1.755   | 0.1907  |
| abrasion,CD - enterotomy,def_1mM          | -0.1773  | 0.434 | Inf | -0.409  | 0.7841  |
| abrasion,CD - abrasion,def_20mM           | -0.1262  | 0.529 | Inf | -0.239  | 0.8636  |
| abrasion,CD - enterotomy,def_20mM         | -1.0420  | 0.657 | Inf | -1.585  | 0.2405  |
| abrasion,CD - abrasion,def_5mM            | 0.7445   | 0.341 | Inf | 2.181   | 0.0836  |
| abrasion,CD - enterotomy,def_5mM          | -0.1513  | 0.445 | Inf | -0.340  | 0.8072  |
| enterotomy,CD - abrasion,def_10mM         | 1.1015   | 0.463 | Inf | 2.377   | 0.0606  |
| enterotomy,CD - enterotomy,def_10mM       | 0.1807   | 0.471 | Inf | 0.384   | 0.7841  |
| enterotomy,CD - abrasion,def_1mM          | 1.6402   | 0.573 | Inf | 2.861   | 0.0199  |
| enterotomy,CD - enterotomy,def_1mM        | 0.7427   | 0.425 | Inf | 1.746   | 0.1907  |
| enterotomy,CD - abrasion,def_20mM         | 0.7938   | 0.525 | Inf | 1.512   | 0.2612  |
| enterotomy,CD - enterotomy,def_20mM       | -0.1220  | 0.506 | Inf | -0.241  | 0.8636  |
| enterotomy,CD - abrasion,def_5mM          | 1.6645   | 0.460 | Inf | 3.616   | 0.0066  |
| enterotomy,CD - enterotomy,def_5mM        | 0.7686   | 0.350 | Inf | 2.198   | 0.0836  |
| abrasion,def_10mM - enterotomy,def_10mM   | -0.9208  | 0.300 | Inf | -3.074  | 0.0116  |
| abrasion,def_10mM - abrasion,def_1mM      | 0.5387   | 0.554 | Inf | 0.972   | 0.4965  |
| abrasion,def_10mM - enterotomy,def_1mM    | -0.3588  | 0.490 | Inf | -0.732  | 0.6373  |
| abrasion,def_10mM - abrasion,def_20mM     | -0.3078  | 0.578 | Inf | -0.533  | 0.7132  |
| abrasion,def_10mM - enterotomy,def_20mM   | -1.2235  | 0.631 | Inf | -1.941  | 0.1337  |
| abrasion,def_10mM - abrasion,def_5mM      | 0.5630   | 0.471 | Inf | 1.195   | 0.3738  |
| abrasion,def_10mM - enterotomy,def_5mM    | -0.3329  | 0.464 | Inf | -0.717  | 0.6373  |
| enterotomy,def_10mM - abrasion,def_1mM    | 1.4596   | 0.753 | Inf | 1.938   | 0.1337  |
| enterotomy,def_10mM - enterotomy,def_1mM  | 0.5620   | 0.576 | Inf | 0.976   | 0.4965  |
| enterotomy,def_10mM - abrasion,def_20mM   | 0.6131   | 0.654 | Inf | 0.937   | 0.5098  |
| enterotomy,def_10mM - enterotomy,def_20mM | -0.3027  | 0.564 | Inf | -0.537  | 0.7132  |
| enterotomy,def_10mM - abrasion,def_5mM    | 1.4838   | 0.645 | Inf | 2.299   | 0.0700  |
| enterotomy,def_10mM - enterotomy,def_5mM  | 0.5879   | 0.487 | Inf | 1.208   | 0.3738  |
| abrasion,def_1mM - enterotomy,def_1mM     | -0.8976  | 0.283 | Inf | -3.168  | 0.0116  |
| abrasion,def_1mM - abrasion,def_20mM      | -0.8465  | 0.608 | Inf | -1.391  | 0.3095  |
| abrasion,def_1mM - enterotomy,def_20mM    | -1.7622  | 0.771 | Inf | -2.286  | 0.0700  |
| abrasion,def_1mM - abrasion,def_5mM       | 0.0243   | 0.399 | Inf | 0.061   | 0.9618  |
| abrasion,def_1mM - enterotomy,def_5mM     | -0.8716  | 0.562 | Inf | -1.550  | 0.2498  |
| enterotomy,def_1mM - abrasion,def_20mM    | 0.0511   | 0.550 | Inf | 0.093   | 0.9618  |
| enterotomy,def_1mM - enterotomy,def_20mM  | -0.8647  | 0.604 | Inf | -1.432  | 0.2954  |
| enterotomy,def_1mM - abrasion,def_5mM     | 0.9218   | 0.435 | Inf | 2.121   | 0.0933  |
| enterotomy,def_1mM - enterotomy,def_5mM   | 0.0260   | 0.427 | Inf | 0.061   | 0.9618  |
| abrasion,def_20mM - enterotomy,def_20mM   | -0.9158  | 0.290 | Inf | -3.158  | 0.0116  |
| abrasion,def_20mM - abrasion,def_5mM      | 0.8707   | 0.532 | Inf | 1.637   | 0.2236  |
| abrasion,def_20mM - enterotomy,def_5mM    | -0.0251  | 0.525 | Inf | -0.048  | 0.9618  |
| enterotomy,def_20mM - abrasion,def_5mM    | 1.7865   | 0.667 | Inf | 2.679   | 0.0286  |
| enterotomy,def_20mM - enterotomy,def_5mM  | 0.8906   | 0.520 | Inf | 1.712   | 0.1980  |
| abrasion,def_5mM - enterotomy,def_5mM     | -0.8959  | 0.290 | Inf | -3.087  | 0.0116  |

P value adjustment: fdr method for 66 tests

In [6]:

```
%%R
rajan_df_HE <- subset(rajan_df, !is.na(inflammation_HE))
clm_model <- clm(factor(inflammation_HE, ordered=TRUE) ~ treatment, data=rajan_df_HE, link="logit")
print(summary(clm_model))
print(emmeans(clm_model, ~ treatment, mode="mean.class", adjust='fdr'))
print(emmeans(clm_model, pairwise ~ treatment, mode="mean.class", adjust='fdr'))
```

```
formula: factor(inflammation_HE, ordered = TRUE) ~ treatment
data:      rajan_df_HE
```

```
link threshold nobs logLik AIC      niter max.grad cond.H
logit flexible  60  -63.47 138.95 4(0)  6.09e-10 4.3e+01
```

Coefficients:

|                   | Estimate | Std. Error | z value | Pr(> z ) |
|-------------------|----------|------------|---------|----------|
| treatmentCD       | -0.4210  | 0.7818     | -0.539  | 0.590    |
| treatmentdef_10mM | -1.1918  | 0.7511     | -1.587  | 0.113    |
| treatmentdef_20mM | -0.6470  | 0.7718     | -0.838  | 0.402    |
| treatmentdef_5mM  | -1.0778  | 0.8013     | -1.345  | 0.179    |

Threshold coefficients:

|     | Estimate | Std. Error | z value |
|-----|----------|------------|---------|
| 1 2 | -1.73940 | 0.60555    | -2.872  |
| 2 3 | 0.04147  | 0.55876    | 0.074   |

| treatment | mean.class | SE    | df  | asympt.LCL | asympt.UCL |
|-----------|------------|-------|-----|------------|------------|
| _Saline   | 2.34       | 0.209 | Inf | 1.93       | 2.75       |
| CD        | 2.18       | 0.222 | Inf | 1.74       | 2.61       |
| def_10mM  | 1.86       | 0.200 | Inf | 1.47       | 2.25       |
| def_20mM  | 2.08       | 0.219 | Inf | 1.65       | 2.51       |
| def_5mM   | 1.91       | 0.233 | Inf | 1.45       | 2.36       |

Confidence level used: 0.95

```

$emmeans
  treatment mean.class   SE df asymp.LCL asymp.UCL
  _Saline      2.34 0.209 Inf    1.93    2.75
  CD           2.18 0.222 Inf    1.74    2.61
  def_10mM     1.86 0.200 Inf    1.47    2.25
  def_20mM     2.08 0.219 Inf    1.65    2.51
  def_5mM      1.91 0.233 Inf    1.45    2.36

```

Confidence level used: 0.95

```

$constrasts
  contrast          estimate    SE df z.ratio p.value
  _Saline - CD      0.1649 0.305 Inf  0.541 0.7357
  _Saline - def_10mM 0.4810 0.290 Inf  1.659 0.7357
  _Saline - def_20mM 0.2570 0.303 Inf  0.849 0.7357
  _Saline - def_5mM  0.4345 0.313 Inf  1.387 0.7357
  CD - def_10mM     0.3161 0.299 Inf  1.056 0.7357
  CD - def_20mM     0.0921 0.312 Inf  0.295 0.8533
  CD - def_5mM      0.2695 0.322 Inf  0.836 0.7357
  def_10mM - def_20mM -0.2240 0.297 Inf -0.754 0.7357
  def_10mM - def_5mM -0.0466 0.307 Inf -0.152 0.8796
  def_20mM - def_5mM  0.1774 0.320 Inf  0.554 0.7357

```

P value adjustment: fdr method for 10 tests

In [7]:

```

%%R
rajan_df_MT <- subset(rajan_df, !is.na(fibrosis_MT))
clm_model <- clm(factor(fibrosis_MT, ordered=TRUE) ~ treatment, data=rajan_df_MT, link="logit")
print(summary(clm_model))
print(emmeans(clm_model, ~ treatment, mode="mean.class", adjust='fdr'))
print(emmeans(clm_model, pairwise ~ treatment, mode="mean.class", adjust='fdr'))

```

```

formula: factor(fibrosis_MT, ordered = TRUE) ~ treatment
data:    rajan_df_MT

```

```

link threshold nobs logLik AIC      niter max.grad cond.H
logit flexible  60  -61.54 135.08 4(0)  1.07e-07 4.2e+01

```

Coefficients:

```

      Estimate Std. Error z value Pr(>|z|)
treatmentCD      -0.7917   0.7932  -0.998  0.3183
treatmentdef_10mM -1.5763   0.7901 -1.995  0.0460 *
treatmentdef_20mM -0.9851   0.8066 -1.221  0.2220
treatmentdef_5mM  -1.6682   0.8311 -2.007  0.0447 *
---

```

Signif. codes: 0 '\*\*\*' 0.001 '\*\*' 0.01 '\*' 0.05 '.' 0.1 ' ' 1

Threshold coefficients:

```

      Estimate Std. Error z value
1|2  -2.2107   0.6553  -3.373
2|3  -0.1982   0.5875  -0.337
treatment mean.class   SE df asymp.LCL asymp.UCL
  _Saline      2.45 0.197 Inf    2.06    2.84
  CD           2.16 0.205 Inf    1.76    2.56
  def_10mM     1.85 0.195 Inf    1.47    2.24
  def_20mM     2.09 0.214 Inf    1.67    2.50
  def_5mM      1.82 0.217 Inf    1.39    2.24

```

Confidence level used: 0.95

```

$emmeans
  treatment mean.class   SE df asymp.LCL asymp.UCL
  _Saline      2.45 0.197 Inf    2.06    2.84
  CD           2.16 0.205 Inf    1.76    2.56
  def_10mM     1.85 0.195 Inf    1.47    2.24
  def_20mM     2.09 0.214 Inf    1.67    2.50
  def_5mM      1.82 0.217 Inf    1.39    2.24

```

Confidence level used: 0.95

```

$constrasts
  contrast          estimate    SE df z.ratio p.value
  _Saline - CD      0.2896 0.284 Inf  1.018 0.5142
  _Saline - def_10mM 0.5958 0.278 Inf  2.144 0.1603
  _Saline - def_20mM 0.3647 0.291 Inf  1.254 0.5142
  _Saline - def_5mM  0.6313 0.293 Inf  2.152 0.1603
  CD - def_10mM     0.3063 0.283 Inf  1.081 0.5142
  CD - def_20mM     0.0751 0.296 Inf  0.254 0.8885
  CD - def_5mM      0.3417 0.298 Inf  1.145 0.5142
  def_10mM - def_20mM -0.2311 0.290 Inf -0.798 0.5310
  def_10mM - def_5mM  0.0355 0.291 Inf  0.122 0.9031
  def_20mM - def_5mM  0.2666 0.304 Inf  0.876 0.5310

```

P value adjustment: fdr method for 10 tests

In [8]:

```

%%R
rajan_df_MT_emmeans <- as.data.frame(emmeans(clm_model, ~ treatment, mode="mean.class", adjust='fdr'))
rajan_df_MT_emmeans

```

```

  treatment mean.class   SE df asymp.LCL asymp.UCL
1  _Saline  2.450602 0.1973889 Inf  2.063727  2.837477
2     CD    2.161037 0.2051169 Inf  1.759015  2.563059
3 def_10mM  1.854784 0.1952412 Inf  1.472119  2.237450
4 def_20mM  2.085894 0.2137178 Inf  1.667015  2.504773
5 def_5mM   1.819321 0.2165507 Inf  1.394889  2.243752

```

In [9]:

```

%R -o rajan_df_MT_emmeans

```

```
rajan_df_MT_emmeans = rajan_df_MT_emmeans.reindex([0,1,3,2,4])
```

```
rajan_df_MT_emmeans
```

```
Out[9]:
```

|   | treatment | mean.class | SE       | df  | asympt.LCL | asympt.UCL |
|---|-----------|------------|----------|-----|------------|------------|
| 0 | Saline    | 2.450602   | 0.197389 | inf | 2.063727   | 2.837477   |
| 1 | CD        | 2.161037   | 0.205117 | inf | 1.759015   | 2.563059   |
| 3 | def_20mM  | 2.085894   | 0.213718 | inf | 1.667015   | 2.504773   |
| 2 | def_10mM  | 1.854784   | 0.195241 | inf | 1.472119   | 2.237450   |
| 4 | def_5mM   | 1.819321   | 0.216551 | inf | 1.394889   | 2.243752   |

```
In [10]:
```

```
%matplotlib inline
from matplotlib import pyplot

bars = []

#set up colours
cmap_tab20 = pyplot.get_cmap('tab20')
colours = list(cmap_tab20.colors[::2])[0:5]
colours = [colours[0], colours[1], colours[3], colours[4], colours[2]]

for i, (index, row) in enumerate(rajan_df_MT_emmeans.iterrows()):
    _means = [row['mean.class']]
    _sems = row['SE']
    print(row['treatment'], _means)
    bar = pyplot.bar([i], _means, width=0.6, color=colours[i])
    bars.append(bar)
    error = pyplot.errorbar([i], _means, yerr=_sems, color='black')

pyplot.xticks([0,1,2,3, 4], ["Saline", 'CD', 'Def_20mM', 'Def_10mM', 'Def_5mM'])
pyplot.ylabel("Grade of fibrosis on Masson's Trichrome\n(mean of the ordinal response)")

pyplot.text(1.5, 2.72, "p=0.046", fontsize=10, horizontalalignment='center')
pyplot.hlines(2.7, 0, 3)

pyplot.text(2, 2.82, "p=0.045", fontsize=10, horizontalalignment='center')
pyplot.hlines(2.8, 0, 4)

pyplot.ylim(1.4, 2.9)

pyplot.savefig("./results/study1_MT_scores.jpg", dpi=300, bbox_inches="tight")

_Saline [2.4506017628330117]
CD [2.1610368841514256]
def_20mM [2.0858940032142805]
def_10mM [1.854784387246275]
def_5mM [1.819320634114203]
```

```
In [11]:
```

```
%matplotlib inline
from matplotlib import pyplot
import seaborn

#set up colours
seaborn.set_palette('tab10')

ax = seaborn.barplot(x="treatment", y="markus_score", data=rajan_df, palette=colours)
ax.set_ylabel("Grade of adhesion\n(mean of the ordinal response)")

#pyplot.text(0.5, 70 +1, "p=0.0398", fontsize=10, horizontalalignment='center')
#pyplot.hlines(70, 0, 1)

#pyplot.text(1,75 +1, "p=0.0096", fontsize=10, horizontalalignment='center')
#pyplot.hlines(75, 0, 2)

#pyplot.ylim(0, 80)
fig = ax.get_figure()
fig.savefig("./results/study1_markus_score.jpg", dpi=300, bbox_inches='tight')
```

## Method: J

All statistics were performed using R statistical software (R Foundation for Statistical Computing, Vienna, Austria) through the Jupyter notebook interface. The R package "ordinal" was used for ordinal regression. The "clm" function was used to fit a Cumulative Link Model, with the semi-quantitative adhesion scores as the ordinal outcome variable. The means of the ordinal response (interpreted as a numeric value from 1 to the number of classes) were calculated and post-hoc pairwise contrasts for each pair of levels of the treatment variable were compared using the "emmeans" package. (cite emmeans)
